# Supplementary material for: Randomness in highly reflective silver nanoparticles and their localized optical fields
Source: PubMed Central journal article supplement — Sci Rep. 2014 Aug 15;4:6077. doi: 10.1038/srep06077 (PMC4133708; doi:10.1038/srep06077), 2014-08-15
Supplement: srep06077-s1.pdf [file srep06077-s1.pdf]

# Randomness in highly reflective silver nanoparticles and their localized optical fields

Makoto Naruse<sup>1,2</sup>, Takeharu Tani<sup>3</sup>, Hideki Yasuda<sup>3</sup>,  
Naoya Tate<sup>2,4</sup>, Motoichi Ohtsu<sup>2,4</sup>, and Masayuki Naya<sup>3</sup>

*1 Photonic Network Research Institute, National Institute of Information and Communications Technology, 4-2-1 Nukui-kita, Koganei, Tokyo 184-8795, Japan*

*2 Nanophotonics Research Center, Graduate School of Engineering, The University of Tokyo, 2-11-16 Yayoi, Bunkyo-ku, Tokyo 113-8656, Japan*

*3 Frontier Core-Technology Laboratories, Research and Development Management Headquarters, Fujifilm Corporation, Nakanuma, Minamiashigara, Kanagawa 250-0193, Japan*

*4 Department of Electrical Engineering and Information Systems, Graduate School of Engineering, The University of Tokyo, 2-11-16 Yayoi, Bunkyo-ku, Tokyo 113-8656, Japan*

## Supplementary information

**Angular spectrum representation.** The angular spectrum representation of an electromagnetic field expresses an optical field as a superposition of plane waves including evanescent components<sup>15,16</sup>, which allows us to explicitly represent and quantify optical near-fields. Suppose that the transverse electric (TE) and transverse magnetic (TM) vectors and the unit wavevector are given in a Cartesian coordinate system shown in Fig. 6a and are respectively given by

$$\boldsymbol{\varepsilon}(\mathbf{s}^{(+)}, \text{TE}) = (-\sin \beta, \cos \beta, 0) \quad (1)$$

$$\boldsymbol{\varepsilon}(\mathbf{s}^{(+)}, \text{TM}) = (\cos \alpha \cos \beta, \cos \alpha \sin \beta, -\sin \alpha) \quad (2)$$

$$\mathbf{s}^{(+)} = (s_x, s_y, s_z) = (\sin \alpha \cos \beta, \sin \alpha \sin \beta, \cos \alpha). \quad (3)$$

What should be noted is that while the angle  $\beta$  is real ( $-\pi \leq \beta < \pi$ ),  $\alpha$  takes a complex value.

This allows us to explicitly and intuitively deal with optical near-fields. It is useful to introduce

$s_{\parallel} = \sin \alpha$ , which allows us to write the parameter  $s_z$  of the wavevector  $\mathbf{s}^{(+)}$  as

$$s_z = \begin{cases} \sqrt{1-s_{\parallel}^2} & \text{for } 0 \leq s_{\parallel} < 1 \\ i\sqrt{s_{\parallel}^2-1} & \text{for } 1 \leq s_{\parallel} < +\infty. \end{cases} \quad (4)$$

The value of  $s_{\parallel}$  specifies the property of a plane wave as a homogeneous wave ( $0 \leq s_{\parallel} < 1$ ) or an

evanescent wave ( $1 \leq s_{\parallel} < +\infty$ ). The electric field  $\mathbf{E}(\mathbf{r})$  originated by a point dipole  $\mathbf{d}^{(i)}$  with

frequency  $K$  is given in the form<sup>16</sup>

$$\mathbf{E}(\mathbf{r}) = \left( \frac{iK^3}{8\pi^2 \varepsilon_0} \right) \sum_{\mu=\text{TE}}^{\text{TM}} \int \int_{-\infty}^{\infty} ds_x ds_y \frac{1}{s_z} [\boldsymbol{\varepsilon}(\mathbf{s}^{(+)}, \mu) \cdot \mathbf{d}^{(i)}] \boldsymbol{\varepsilon}(\mathbf{s}^{(+)}, \mu) \exp(iK\mathbf{s}^{(+)} \cdot \mathbf{r}) \quad (5)$$

which corresponds to eq. (2) in the main text.
